# Supplementary material for: A one-pot route for the synthesis of Au@Pd/PMo12/rGO as a dual functional electrocatalyst for ethanol electro-oxidation and hydrogen evolution reaction
Source: Royal Society of Chemistry journal article supplement (doi:10.1039/c9ra06915a), 2019-01-01
Supplement: c9ra06915a1.pdf [file c9ra06915a1.pdf]

## Electronic Supplementary Information

# A One-Pot Route to the Synthesis of Au@Pd/PMo<sub>12</sub>/rGO as a Dual Functional Electrocatalyst for Ethanol Electro-oxidation and Hydrogen Evolution Reaction

Ali Ahmadpour<sup>a,\*</sup>, Sara Khadempir<sup>b,\*</sup>, Narges Ashraf<sup>c</sup>, Mahdi H. Ahangari<sup>a</sup>, Scott G. Mitchell<sup>d</sup>

<sup>a</sup> Department of Chemical Engineering, Ferdowsi University of Mashhad, Mashhad, Iran.

<sup>b</sup> Department of Chemical Engineering, Quchan University of Technology, Quchan, Iran.

<sup>c</sup> Department of Chemistry, Faculty of Sciences, Ferdowsi University of Mashhad, Mashhad, Iran.

<sup>d</sup> Instituto de Ciencia de Materiales de Aragón (ICMA-CSIC), CISC-Universidad de Zaragoza & CIBER-BBN, 50009-Zaragoza, Spain.

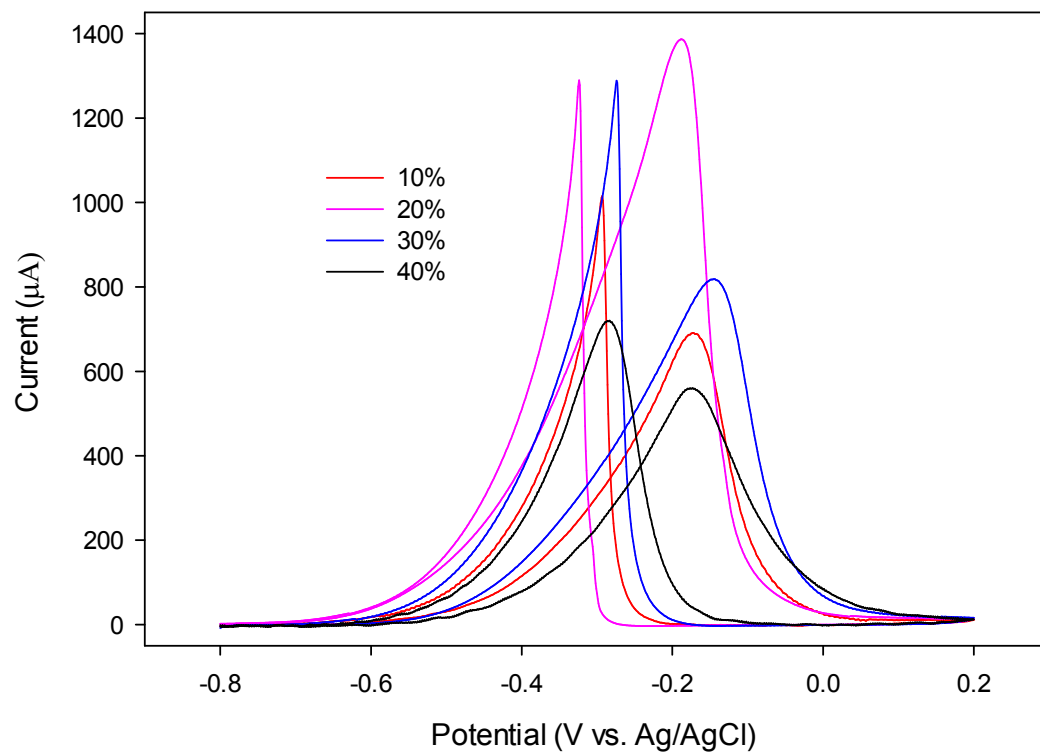

Fig.S1: Cyclic voltammetric curves for Au@Pd/PMo<sub>12</sub>/rGO at different loading of Au@Pd NPs on rGO in 1.0 M NaOH + 1.0 M ethanol, scan rate: 50 mV s<sup>-1</sup>

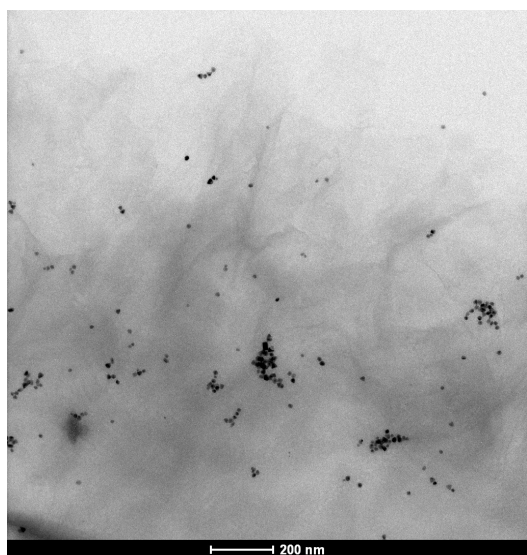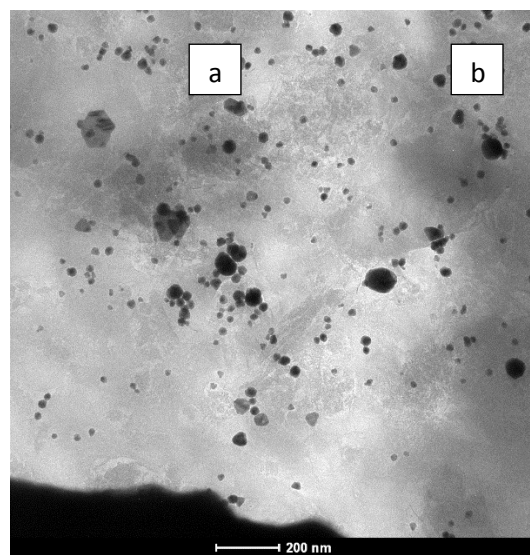

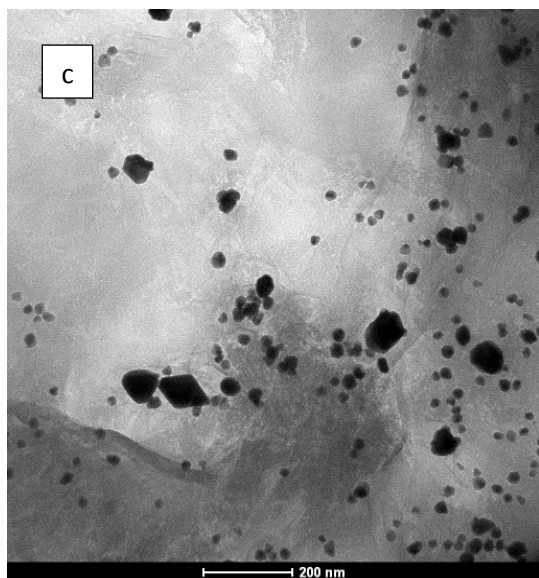

Fig. S2: TEM images of Au@Pd/PMo<sub>12</sub>/rGO nanohybrid with different loading of Au@Pd NPs rGO, (a) 10%, (b) 30% and (c) 40%.
